# Supplementary material for: Methylene Blue Protects against TDP-43 and FUS Neuronal Toxicity in C. elegans and D. rerio
Source: PLOS journal article supplement (doi:10.1371/journal.pone.0042117), 2012-07-27
Supplement: S2 (10.1371/journal.pone.0042117.s002) [file journal.pone.0042117.s002]

|          | Strains            | Mean Life Span | p Value        | 75th Percentile (Days) | Maximum Lifespan | Total Number of Animals Died/Total |
|----------|--------------------|----------------|----------------|------------------------|------------------|------------------------------------|
| Figure 5 | N2                 | 18             |                | 22                     | 26               | 59/66                              |
|          | N2 + 6 $\mu$ M MB  | 19             | n.s.<br>0.9288 | 22                     | 25               | 63/70                              |
|          | N2 + 60 $\mu$ M MB | 18             | n.s.<br>0.1773 | 20                     | 25               | 58/64                              |

**Table S1 Lifespan analysis for all experiments.** Related to Figure 5A.

Animals that died prematurely (ruptured, internal hatching) or were lost (crawled off the plate) were censored at the time of scoring. All control and experimental animals were scored and transferred to new plates at the same time. ns: not significant.
